# Supplementary material
Source: MDPI journal article supplement (https://www.mdpi.com/2076-3417/12/24/12827)
Supplement: s1 [file s1]

# Composite Based on Multi-Walled Carbon Nanotubes and Manganese Oxide with Rhenium Additive for Supercapacitors: Structural and Electrochemical Studies

Petr M. Korusenko <sup>1,2,\*</sup> and Sergey N. Nesov <sup>2,3</sup>

<sup>1</sup> Department of Solid State Electronics, St. Petersburg State University, 199034 Saint Petersburg, Russia

<sup>2</sup> Department of Physics, Omsk State Technical University, 644050 Omsk, Russia

<sup>3</sup> Laboratory of Physics of Nanomaterials for Chemical Current Sources, Omsk Scientific Centre Siberian Branch of Russian Academy of Science, 644013 Omsk, Russia

\* Correspondence: p.korusenko@spbu.ru

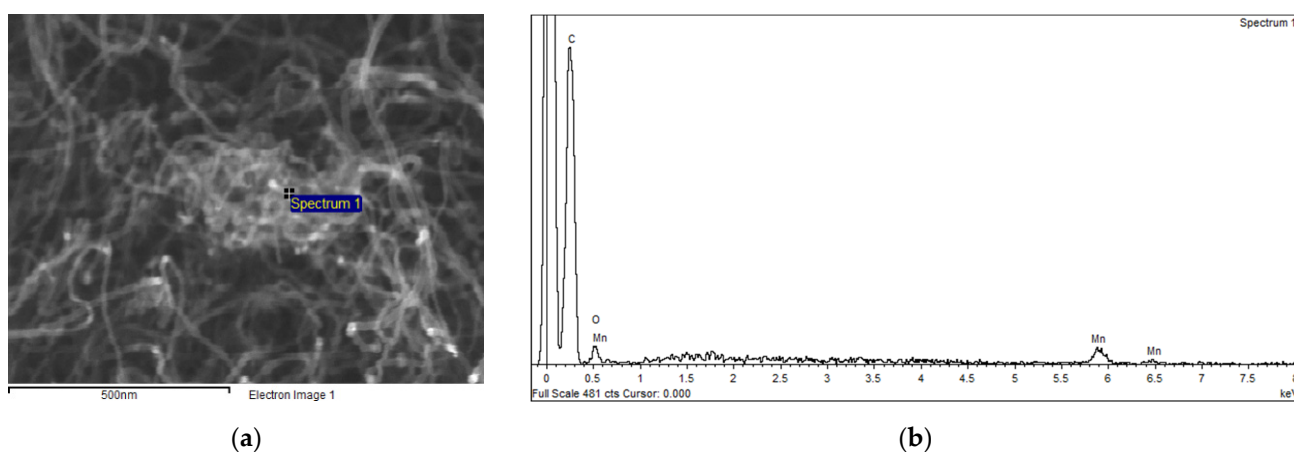

**Figure S1.** SEM image of Mn-0 composite (a) and the EDX spectrum recorded in the selected area (b).

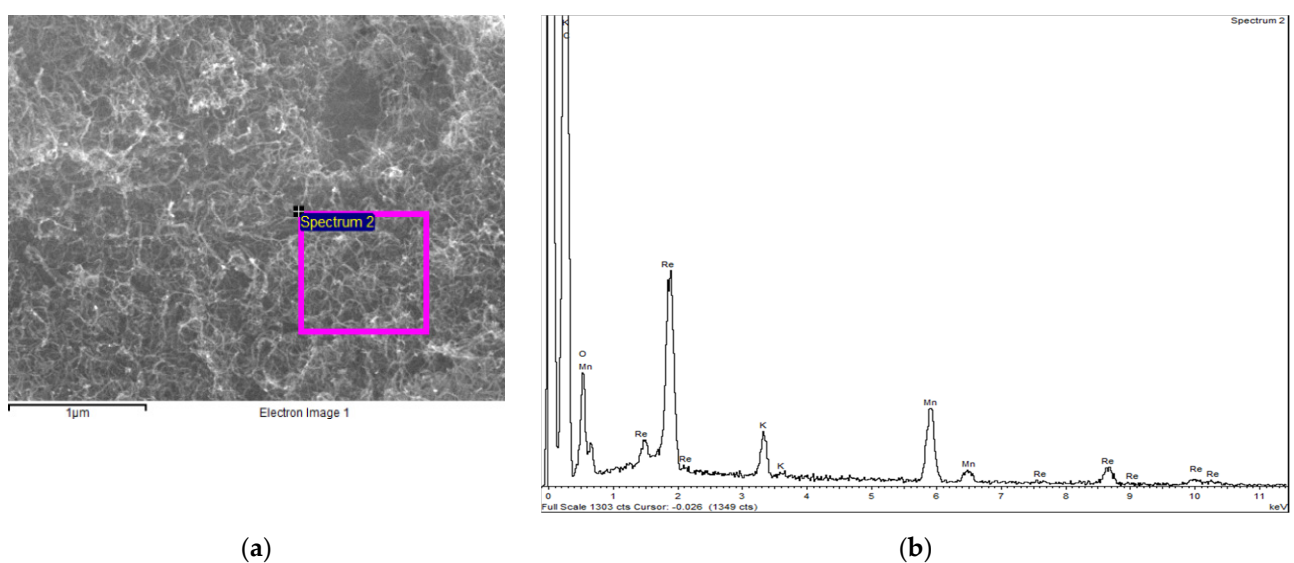

**Figure S2.** SEM image of Mn-580+Re composite (a) and the EDX spectrum recorded in the selected area (b).

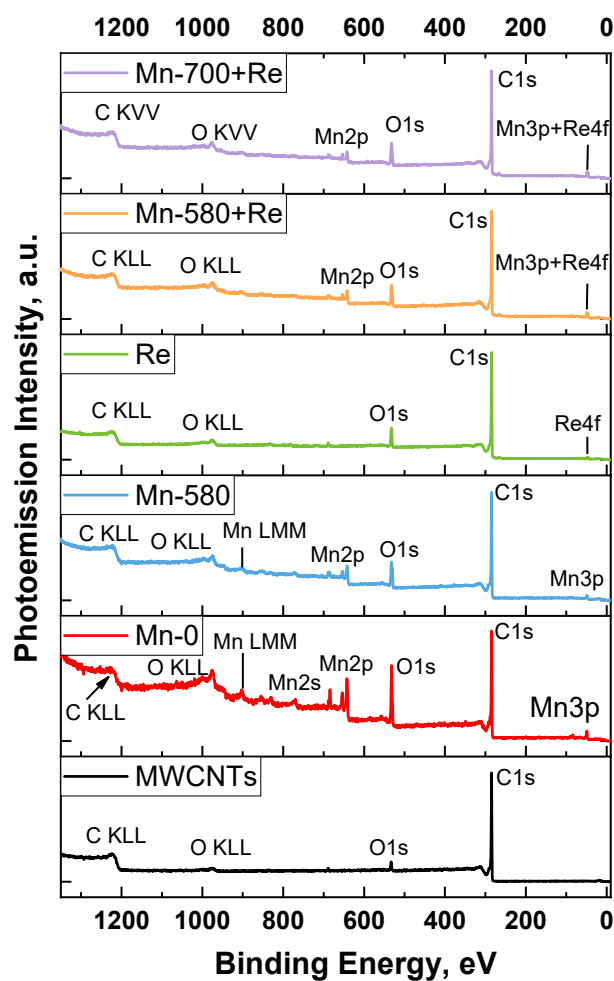

Figure S3. Overview spectra of MWCNTs and composites.

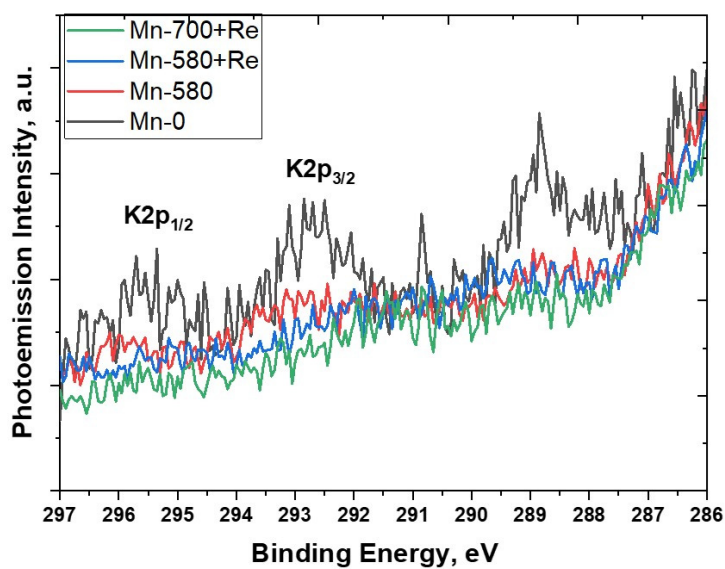

Figure S4. K<sub>2p</sub> photoemission spectra for different composites.

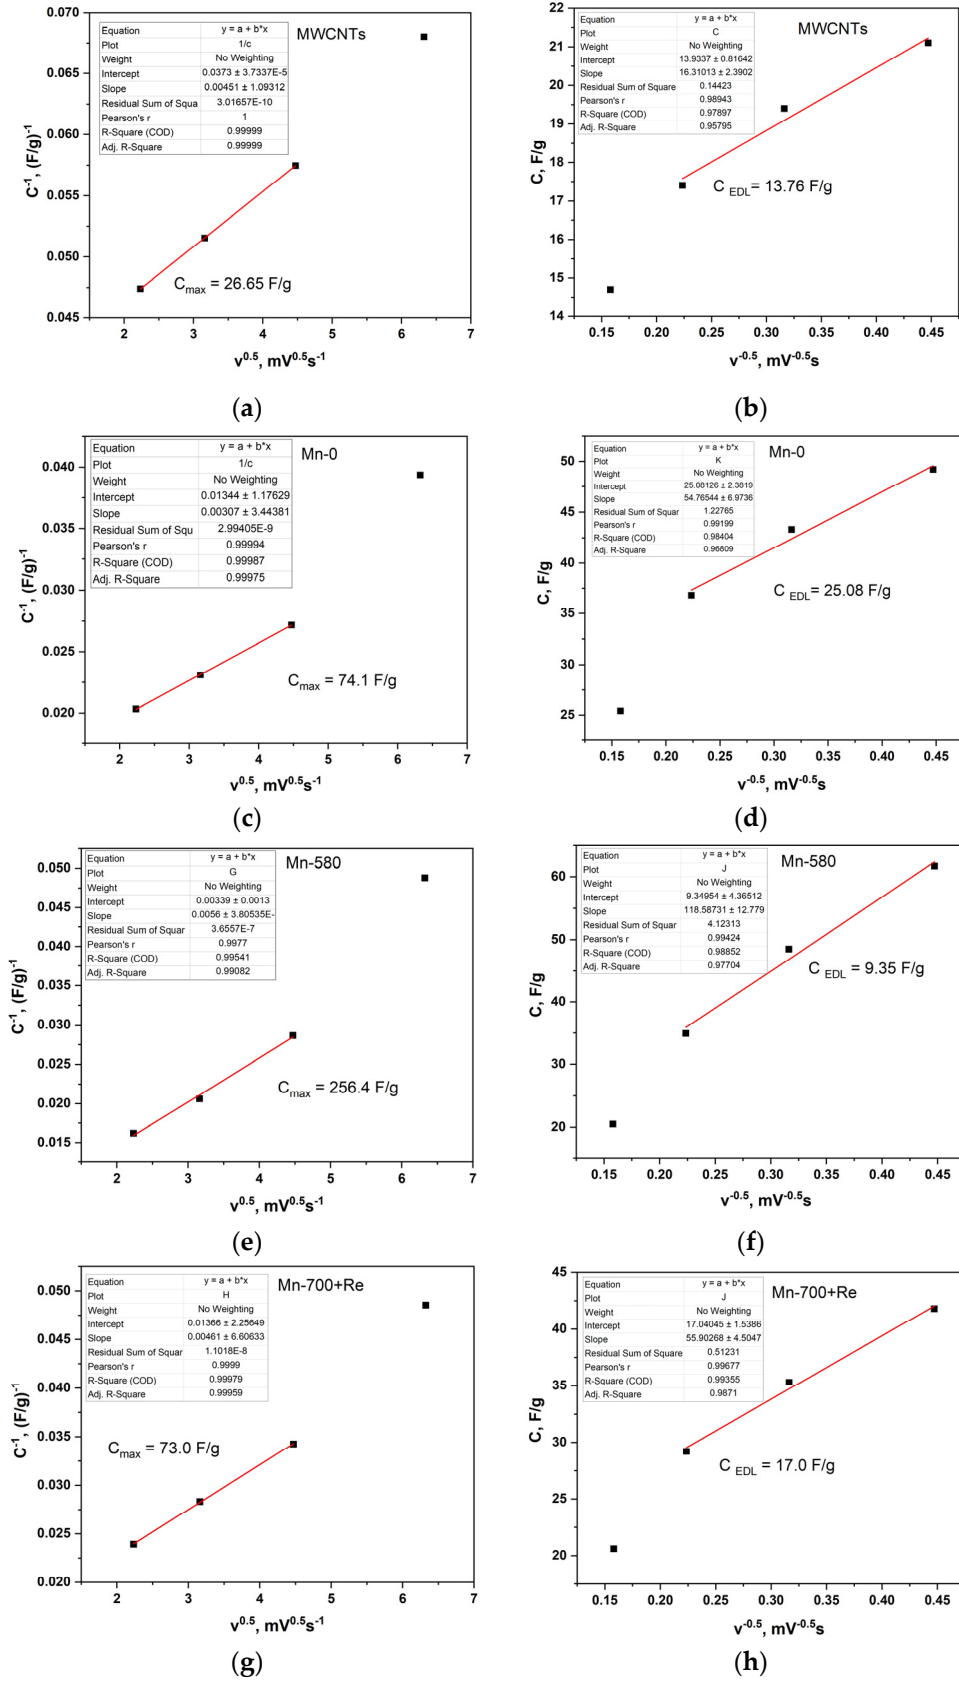

**Figure S5.** The dependence of the reciprocal of the total capacitance ( $C^{-1}$ ,  $(F/g)^{-1}$ ) on the square root of the scan rate ( $v^{0.5}$ ,  $mV^{0.5} \cdot s^{-0.5}$ ) and the total capacitance ( $C$ ,  $F/g$ ) on the reciprocal of the square root of the scan rate ( $v^{-0.5}$ ,  $mV^{-0.5} \cdot s^{0.5}$ ), respectively for the electrodes: MWCNTs (a) and (b), Mn-0 (c) and (d), Mn-580 (e) and (f), Mn-700+Re (g) and (h).

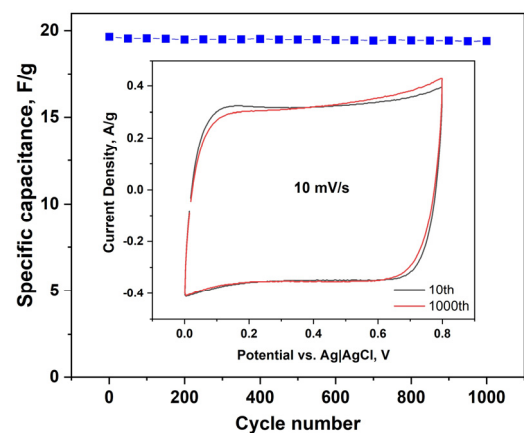

(a)

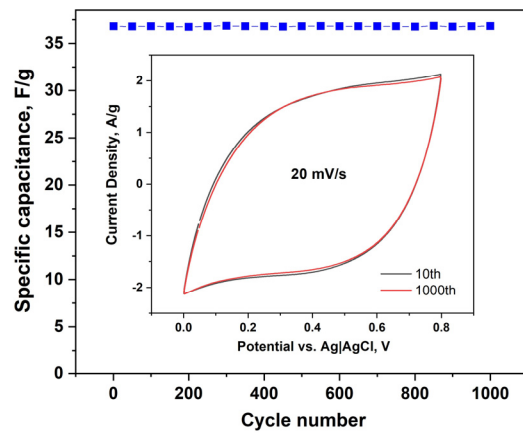

(b)

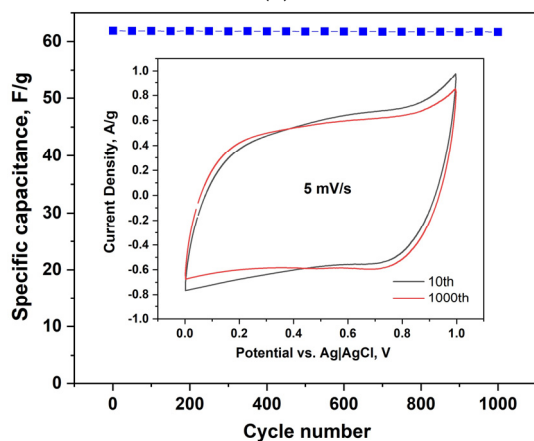

(c)

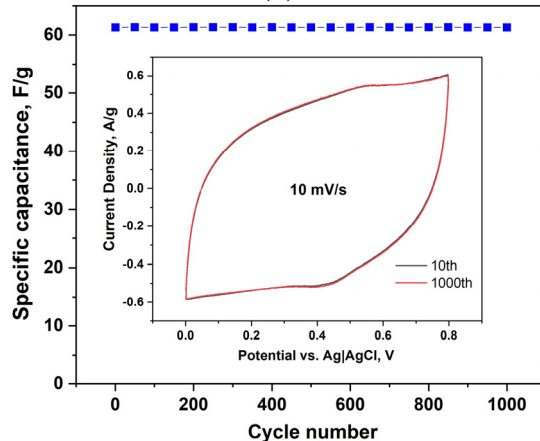

(d)

**Figure S6.** Change in specific capacitance depending on the number of cycles for electrodes based on MWCNTs (a) Mn-0 (b), Mn-580 (c) and Mn-580+Re (d).
